# Supplementary material for: Substrate Effect on the Thermal Expansion of 2D Materials: An Investigation by Machine Learning Interatomic Potentials
Source: MDPI journal article supplement (doi:10.3390/condmat7040067), 2022-11-15
Supplement: s1 [file s1]

# Substrate Effect on the Thermal Expansion of 2D Materials: An Investigation by Machine Learning Interatomic Potentials

Ali Rajabpour <sup>1</sup> and Bohayra Mortazavi <sup>2,\*</sup>

<sup>1</sup> Advanced Simulation and Computing Laboratory, Mechanical Engineering Department, Imam Khomeini International University, Qazvin 3414896818, Iran

<sup>2</sup> Department of Mathematics and Physics, Leibniz Universität Hannover, Appelstraße 11, 30167 Hannover, Germany

\* Correspondence: bohayra.mortazavi@gmail.com

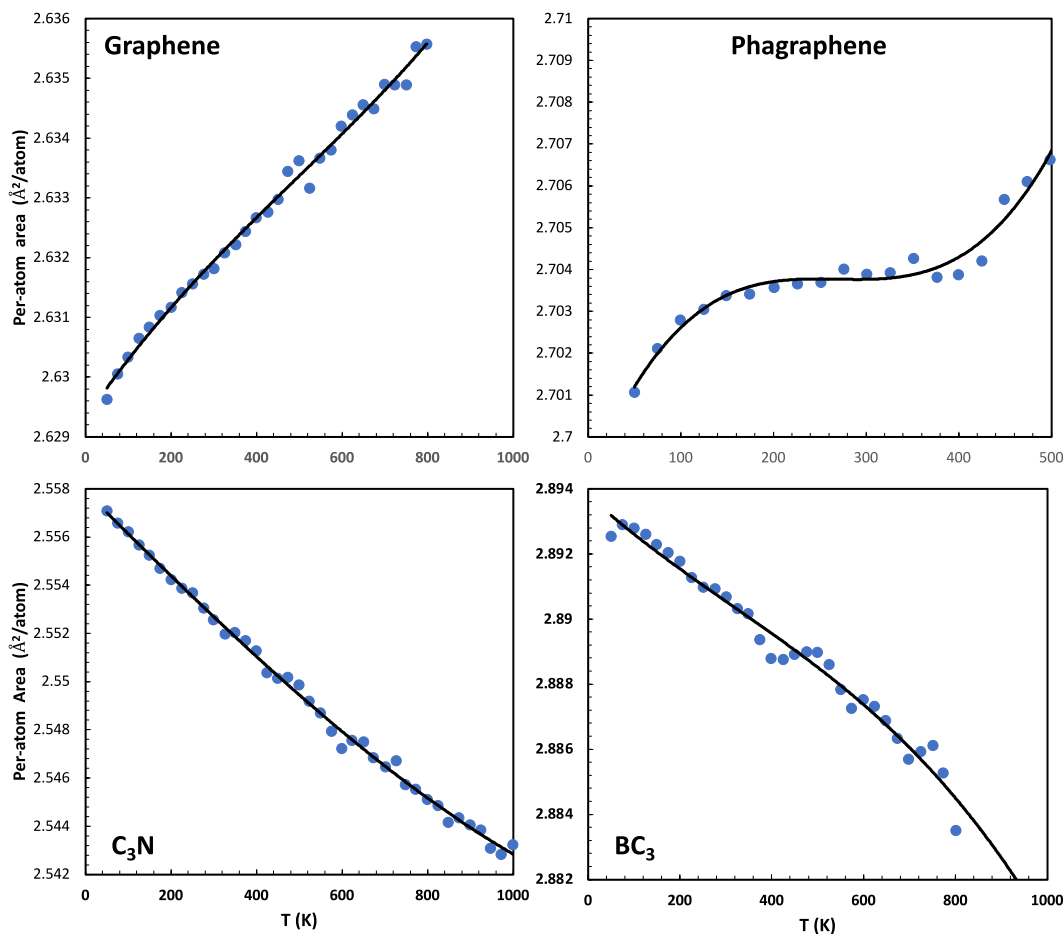

**Figure S1.** Evolution of the supported monolayers per-atom area as a temperature function for the interaction strength of  $\epsilon=4$  meV.

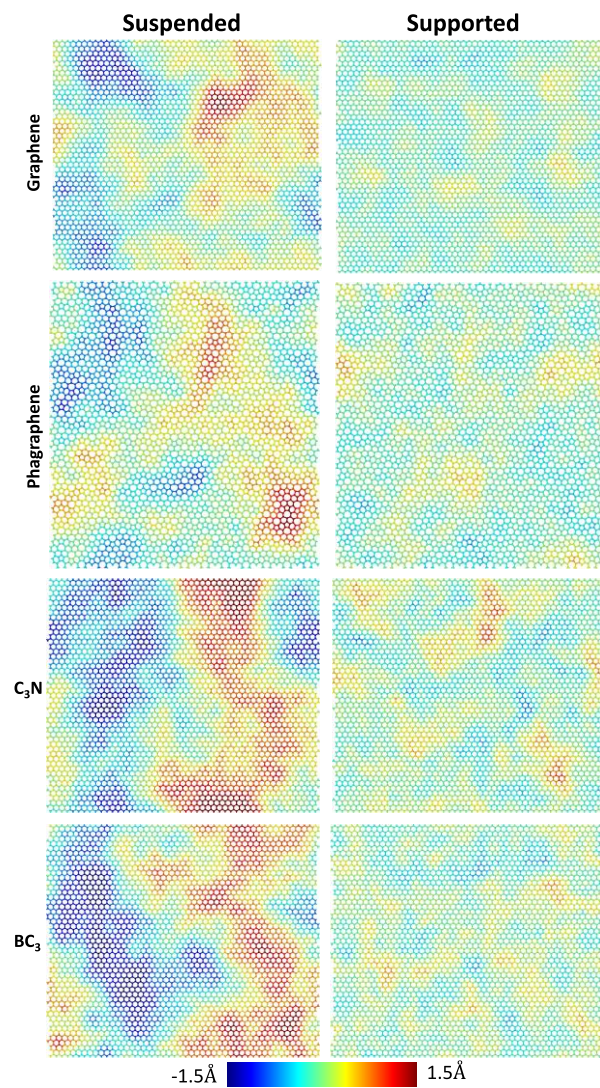

**Figure S2.** Contour of out-of-plane displacement with respect to the center of mass of considered monolayers in suspended form (without substrate) and supported form (with substrate) in  $\varepsilon = 4 \text{ meV}$ .
